# Supplementary material for: Prediction Model for Tumor Budding Status Using the Radiomic Features of F-18 Fluorodeoxyglucose Positron Emission Tomography/Computed Tomography in Cervical Cancer
Source: MDPI journal article supplement (doi:10.3390/diagnostics11081517), 2021-08-23
Supplement: s1 [file s1]

**Table S1.** Radiomic features calculated from  $^{18}\text{F}$ -FDG PET/CT images in Lifex.

|                                                  | Features                                            |
|--------------------------------------------------|-----------------------------------------------------|
| Gray-level co-occurrence matrix (GLCM)           | Homogeneity                                         |
|                                                  | EnergyGLCM                                          |
|                                                  | ContrastGLCM                                        |
|                                                  | CorrelationGLCM                                     |
|                                                  | EntropyGLCM                                         |
|                                                  | Dissimilarity                                       |
| Neighborhood gray-level different matrix (NGLDM) | Contrast <sub>NGTDM</sub>                           |
|                                                  | Coarseness                                          |
| Gray-level run-length matrix (GLRLM)             | Short-Run Emphasis                                  |
|                                                  | Long-Run Emphasis                                   |
|                                                  | Low Gray-level Run Emphasis                         |
|                                                  | High Gray-level Run Emphasis                        |
|                                                  | Short-Run Low Gray-level Emphasis                   |
|                                                  | Short-Run High Gray-level Emphasis                  |
|                                                  | Long-Run Low Gray-level Emphasis                    |
|                                                  | Long-Run High Gray-level Emphasis                   |
|                                                  | Gray-Level Non-Uniformity for run                   |
|                                                  | Run Length Non-Uniformity                           |
| Gray-level zone-length matrix (GLZLM)            | Run Percentage                                      |
|                                                  | Short-Zone Emphasis                                 |
|                                                  | Long-Zone Emphasis                                  |
|                                                  | Low Gray-level Zone Emphasis                        |
|                                                  | High Gray-level Zone Emphasis                       |
|                                                  | Short-Zone Low Gray-level Emphasis                  |
|                                                  | Short-Zone High Gray-level Emphasis                 |
|                                                  | Long-Zone Low Gray-level Emphasis                   |
|                                                  | Long-Zone High Gray-level Emphasis                  |
|                                                  | Gray-Level Non-Uniformity for zone                  |
| Shape and Size                                   | Zone Length Non-Uniformity Zone                     |
|                                                  | Percentage                                          |
| Histogram                                        | Sphericity                                          |
|                                                  | Compacity                                           |
|                                                  | Skewness                                            |
|                                                  | Kurtosis                                            |
|                                                  | Entropy <sub>Hist</sub>                             |
|                                                  | Energy <sub>Hist</sub>                              |
| Conventional parameters                          | SUV minimum                                         |
|                                                  | SUV maximum                                         |
|                                                  | SUVmean                                             |
|                                                  | SUVstandard deviation                               |
|                                                  | SUVpeak within a sphere of 0.5 and 1 mL volume (mL) |
|                                                  | Metabolic tumor volume (MTV)                        |
|                                                  | Total lesion glycolysis (TLG)                       |

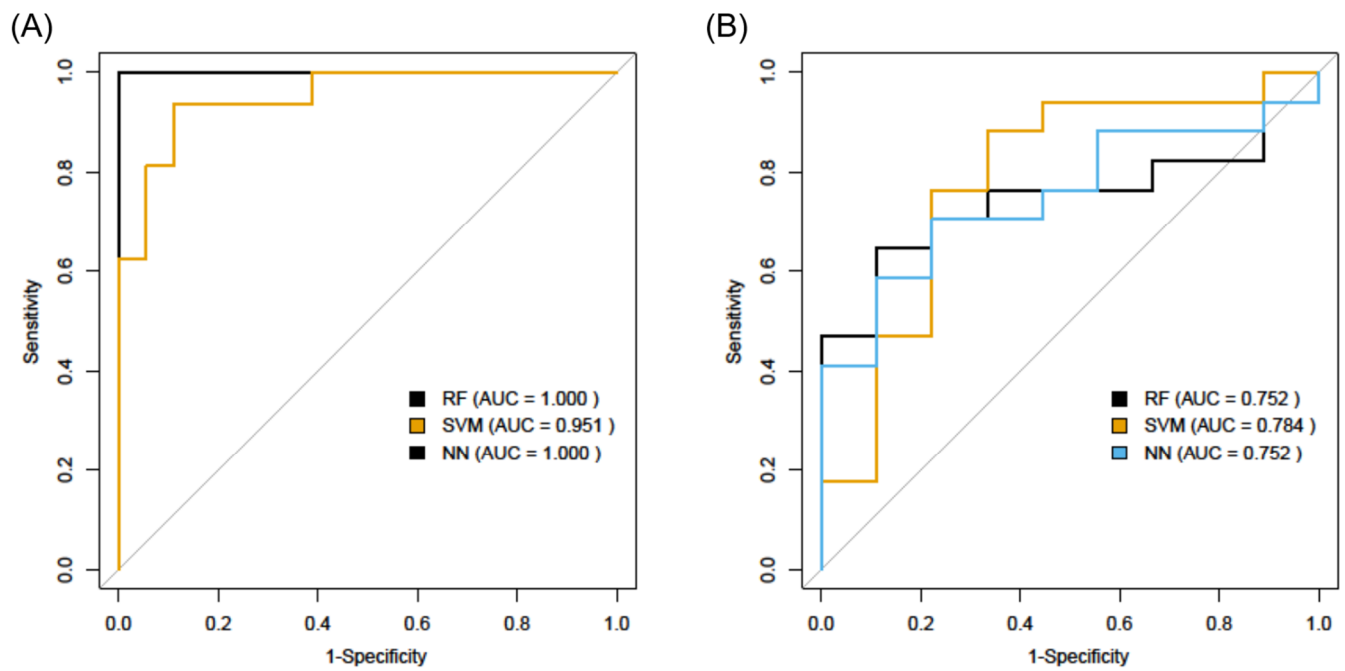

**Figure S1.** shows the ROC curves of the prediction models by three machine learning algorithms in the training and test datasets. The area under the curve (AUC) values of the prediction models constructed by the RF, SVM, and NN were 0.752, 0.784, 0.752 (B), respectively in the test dataset (A).
